# Supplementary material
Source: PubMed Central journal article supplement (PMC6692588)
Supplement: BPH-176-3318-s001.pdf [file BPH-176-3318-s001.pdf]

1  
2

**Table S1 The changes of MN-08 on body weight in rats before and after SAH**

|                                            | Sample size | Number of deaths | Included for analysis | Body weight (kg) |            |            |            |            |
|--------------------------------------------|-------------|------------------|-----------------------|------------------|------------|------------|------------|------------|
|                                            |             |                  |                       | Day 0            | Day 1      | Day 3      | Day 5      | Day 8      |
| <b>Sham</b>                                | 7           | 0                | 7                     | 330.7±9.7        | 333.4±14.1 | 349.6±9.3  | 357.2±11.5 | 378.3±13.3 |
| <b>Model</b>                               | 10          | 3                | 7                     | 327.3±15.8       | 297.4±18.3 | 306.5±14.8 | 317.5±13.8 | 330.2±16.7 |
| <b>MN-08 (3 mg·kg<sup>-1</sup>)</b>        | 10          | 1                | 8                     | 339.7±14.4       | 305.6±20.1 | 312.7±17.5 | 323.7±22.1 | 335.8±17.9 |
| <b>MN-08 (6 mg·kg<sup>-1</sup>)</b>        | 10          | 3                | 7                     | 333.4±13.2       | 301.9±17.6 | 309.7±21.5 | 321.4±24.3 | 324.8±25.1 |
| <b>MN-08 (12 mg·kg<sup>-1</sup>)</b>       | 10          | 2                | 8                     | 329.3±20.3       | 296.7±20.1 | 307.3±24.5 | 315.9±23.7 | 331.9±21.6 |
| <b>Memantine (10 mg·kg<sup>-1</sup>)</b>   | 10          | 3                | 7                     | 334.3±16.4       | 301.8±18.6 | 309.4±22.3 | 320.3±20.4 | 333.6±21.4 |
| <b>Nimodipine (0.1 mg·kg<sup>-1</sup>)</b> | 10          | 3                | 7                     | 321.5±23.4       | 295.3±19.4 | 303.6±19.6 | 315.9±22.4 | 330.5±24.8 |

3 All values are expressed as the mean ± SD ( $n = 7$  for sham group, model group, MN-08 (6 mg·kg<sup>-1</sup>) group, memantine group and nimodipine group;  $n = 8$  for  
4 MN-08 (3 mg·kg<sup>-1</sup>) and MN-08 (12 mg·kg<sup>-1</sup>) group).

Table S2 Physiological parameters in rats before and after SAH

|                                            | pH                 |                   | P <sub>CO2</sub> (mm Hg) |                   | P <sub>O2</sub> (mm Hg) |                   | Blood glucose (mmol/L) |                   |
|--------------------------------------------|--------------------|-------------------|--------------------------|-------------------|-------------------------|-------------------|------------------------|-------------------|
|                                            | Before SAH surgery | After SAH surgery | Before SAH surgery       | After SAH surgery | Before SAH surgery      | After SAH surgery | Before SAH surgery     | After SAH surgery |
| <b>Sham</b>                                | 7.42±0.04          | 7.43±0.05         | 37.02±2.54               | 34.52±4.84        | 59.80±4.32              | 56.40±5.03        | 5.53±1.27              | 5.83±0.74         |
| <b>Model</b>                               | 7.41±0.02          | 7.43±0.04         | 39.20±3.03               | 40.54±6.11        | 62.00±4.08              | 57.09±5.94        | 5.37±0.06              | 6.48±0.89         |
| <b>MN-08 (3 mg·kg<sup>-1</sup>)</b>        | 7.42±0.06          | 7.41±0.06         | 36.60±4.63               | 36.64±3.91        | 62.40±8.20              | 52.00±7.05        | 6.06±1.50              | 5.54±1.21         |
| <b>MN-08 (6 mg·kg<sup>-1</sup>)</b>        | 7.39±0.04          | 7.44±0.04         | 35.70±1.89               | 43.20±2.63        | 55.40±4.32              | 57.60±7.03        | 6.12±1.08              | 6.08±0.56         |
| <b>MN-08 (12 mg·kg<sup>-1</sup>)</b>       | 7.42±0.03          | 7.43±0.01         | 37.80±6.03               | 35.49±2.01        | 58.25±6.40              | 61.20±4.97        | 5.71±0.57              | 5.86±1.76         |
| <b>Memantine (10 mg·kg<sup>-1</sup>)</b>   | 7.44±0.07          | 7.45±0.02         | 38.54±3.48               | 39.88±6.92        | 58.20±4.97              | 61.17±3.28        | 6.11±1.02              | 6.12±0.85         |
| <b>Nimodipine (0.1 mg·kg<sup>-1</sup>)</b> | 7.45±0.00          | 7.37±0.07         | 39.22±4.84               | 39.00±2.96        | 61.17±3.92              | 59.67±3.72        | 6.75±1.45              | 6.48±0.89         |

6 All values are expressed as the mean ± SD ( $n = 7$  for sham group, model group, MN-08 (6 mg·kg<sup>-1</sup>) group, memantine group and nimodipine group;  $n = 8$  for  
7 MN-08 (3 mg·kg<sup>-1</sup>) and MN-08 (12 mg·kg<sup>-1</sup>) group).

Table S3 Physiological parameters in rabbits SAH

|                                             | Sample size | Number of deaths | Included for analysis | Body weight (kg) |           | Body temperature (°C) |              | Blood glucose (mmol/L) |              |
|---------------------------------------------|-------------|------------------|-----------------------|------------------|-----------|-----------------------|--------------|------------------------|--------------|
|                                             |             |                  |                       | Day 0            | Day 4     | Pre-surgery           | Post-surgery | Pre-surgery            | Post-surgery |
| <b>Sham</b>                                 | 6           | 0                | 6                     | 2.40±0.12        | 2.51±0.13 | 38.6±0.8              | 38.8±0.7     | 7.1±0.2                | 7.0±0.4      |
| <b>Model</b>                                | 7           | 1                | 6                     | 2.32±0.11        | 2.21±0.15 | 38.6±0.6              | 38.8±0.5     | 7.1±0.4                | 6.9±0.4      |
| <b>MN-08 (6 mg·kg<sup>-1</sup>)</b>         | 7           | 1                | 6                     | 2.39±0.14        | 2.28±0.14 | 38.8±0.2              | 38.6±0.5     | 7.4±0.4                | 7.6±0.5      |
| <b>Memantine (5 mg·kg<sup>-1</sup>)</b>     | 7           | 1                | 6                     | 2.38±0.13        | 2.27±0.14 | 38.6±0.5              | 38.8±0.3     | 7.1±0.3                | 7.0±0.3      |
| <b>Nimodipine (0.05 mg·kg<sup>-1</sup>)</b> | 7           | 2                | 5                     | 2.37±0.12        | 2.35±0.18 | 38.7±0.3              | 38.6±0.6     | 7.3±0.5                | 7.5±0.4      |

9 All values are expressed as the mean ± SD ( $n = 6$  for sham, model, MN-08, memantine groups and  $n = 5$  for nimodipine group).

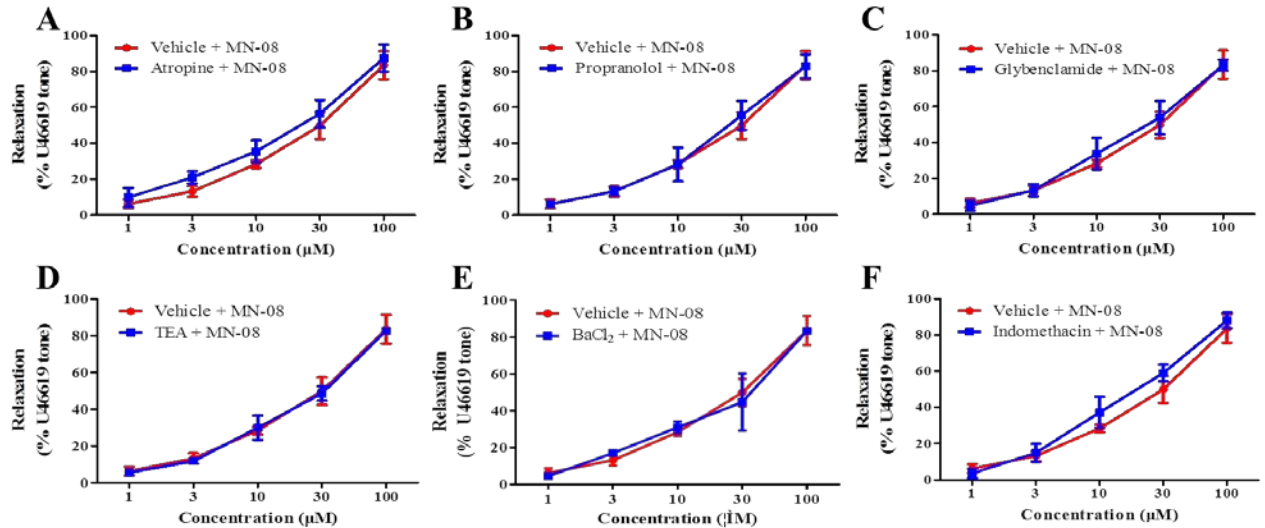

10

11 **Supplementary Fig. S1. The effect of inhibitors on MN-08-induced vasodilatation.** The  
 12 MCA rings were pre-incubated for 20 min with (A) atropine (an inhibitor of mAChRs, 100  
 13 nM), (B) propranolol (an inhibitor of beta-adrenergic receptor, 1  $\mu$ M), (C) glybenclamide (an  
 14 inhibitor of ATP-sensitive K<sup>+</sup> channels, 10  $\mu$ M), (D) tetraethylammonium (TEA, a  
 15 nonselective blocker of K<sup>+</sup> channels, 100 mM), (E) BaCl<sub>2</sub> (an inhibitor of inward rectifier  
 16 K<sup>+</sup> channel, 10  $\mu$ M) or (F) indomethacin (an inhibitor of cyclooxygenase enzymes, 10  $\mu$ M)  
 17 before pre-contraction by U46619. MN-08 (1-100  $\mu$ M) was then added cumulatively. Data  
 18 are expressed as mean  $\pm$  SD from three independent experiments with 2~3 replicates in each  
 19 experiment. Unpaired Student's t test was used to compare the results.

A

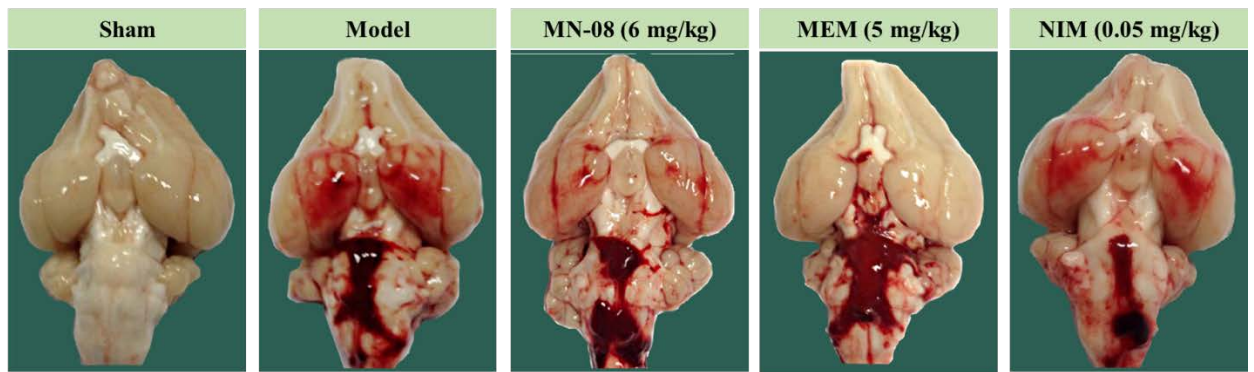

B

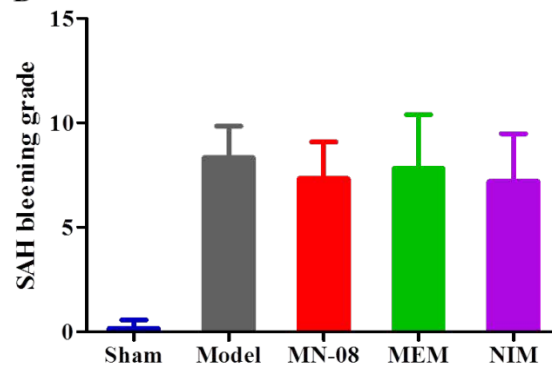

20

21 **Supplementary Fig. S2. The bleeding grades after SAH in a rabbit model.** Rabbits were  
22 treated with MN-08 ( $6 \text{ mg} \cdot \text{kg}^{-1}$ ), memantine ( $5 \text{ mg} \cdot \text{kg}^{-1}$ ), nimodipine ( $0.05 \text{ mg} \cdot \text{kg}^{-1}$ ) or  
23 vehicle control (saline) via intravenous injection for 3 days. (A) Representative images of  
24 blood clots in basal cisterns. (B) Bleeding grade of each group. Data were expressed as mean  
25  $\pm$  SEM ( $n = 6$  for sham group, model group, MN-08 group and memantine group;  $n = 5$  for  
26 nimodipine group). Non-parametric Kruskal-Wallis test followed by Dunn's multiple  
27 comparisons were used to compare the results.
